# Supplementary material
Source: PubMed Central journal article supplement (PMC3494587)
Supplement: auto-8-1557-s01.pdf [file auto-8-1557-s01.pdf]

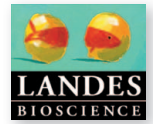

## **Supplemental Material to:**

**Rósula Garcia-Navas, Markus Munder  
and Faustino Mollinedo**

**Depletion of L-arginine induces autophagy  
as a cytoprotective response to endoplasmic reticulum  
stress in human T lymphocytes**

**Autophagy 2012; 8(11)**

**<http://dx.doi.org/10.4161/auto.21315>**

**[www.landesbioscience.com/journals/autophagy/article/21315](http://www.landesbioscience.com/journals/autophagy/article/21315)**

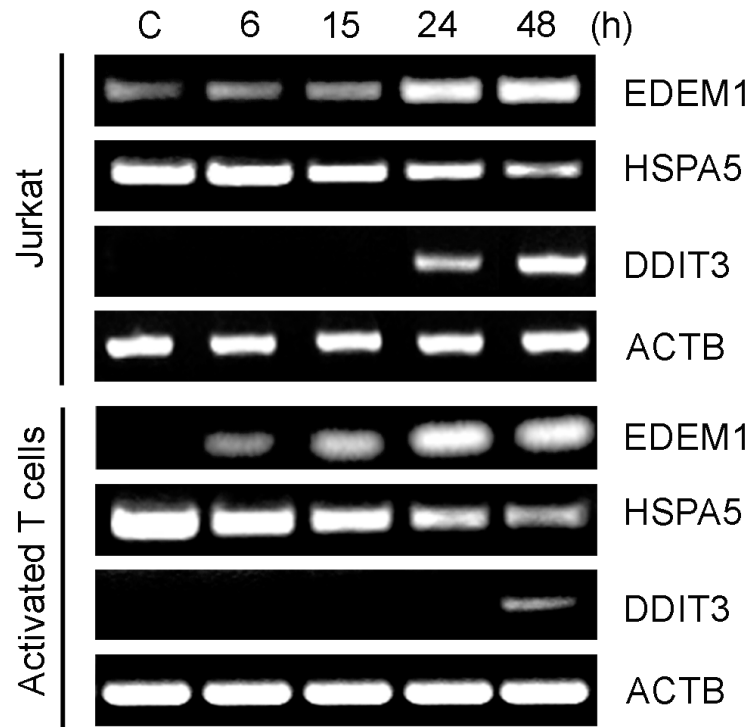

**Figure S1. Semiquantitative RT-PCR of ER stress markers in Jurkat cells and peripheral blood mitogen-activated T cells following L-Arg depletion.** Jurkat and peripheral blood mitogen-activated T cells were incubated with (C) or without L-Arg for the indicated times, and then total RNA was isolated and subjected to semiquantitative RT-PCR using specific primers for the following UPR genes: *EDEM1* (ER degradation-enhancing alpha-mannosidase-like 1), 300 bp; *HSPA5* (heat shock 70 kDa protein 5), 306 bp; *DDIT3* (DNA damage-inducible transcript 3), 357 bp. *ACTB* was used as a loading control. Data shown are representative of 3 experiments performed.
